# Supplementary material for: Synthesis and structural characterization of a single-crystal to single-crystal transformable coordination polymer
Source: Royal Society of Chemistry journal article supplement (doi:10.1039/c3dt52579a), 2013-11-14
Supplement: c3dt52579a.pdf [file c3dt52579a.pdf]

# Synthesis and Structural Characterization of a Single-Crystal to Single-Crystal Transformable Coordination Polymer

Yuyang Tian<sup>a</sup>, Phoebe K. Allan<sup>a</sup>, Catherine L. Renouf<sup>a</sup>, Xiang He<sup>b</sup>, and Russell E. Morris<sup>\*a</sup>

## Supporting Information

### Elemental Analysis of CHNS

The elemental analysis on C, H, N and S of the products was taken place on a Carlo Erba CHNS analyser. The weight contents of C, H, N and S are 35.94%, 2.51%, 3.65% and 7.05%. The calculated values are 34.49%, 2.43%, 3.10% and 7.08%.

### Thermal Stability

The TGA curve of compound **1** was shown in Fig S1. An obvious weight loss of 7.42% ranging from 473K to 513K in air atmosphere can be referred to the removal of the coordinated molecules (calculated weight loss from the complete removal of water is 7.96%).

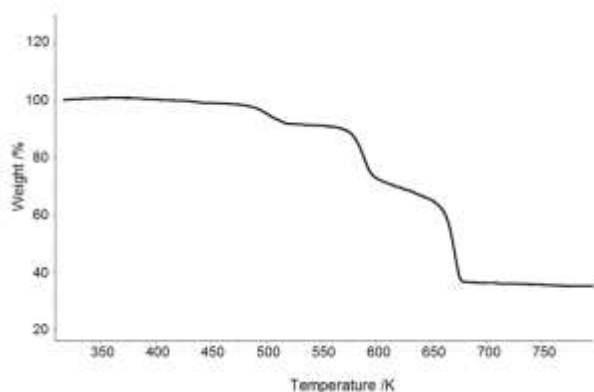

Fig. S1, TGA curve for hydrated sample of compound **1** in air atmosphere at the heating rate of 10Kmin<sup>-1</sup>.

Compound **1** was put in a tube furnace, heated under air at a 10Kmin<sup>-1</sup> rate. After calcined at 520K, 540K, 580K and 600K for 10 min respectively, the residuals were recovered to room temperature. Powder XRD was carried on these residuals. The patterns are shown in Fig S2.

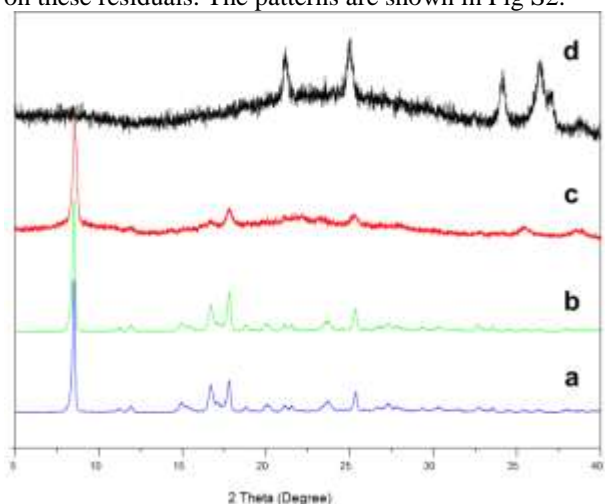

Fig. S2, PXRD pattern of the samples which were calcined at (a) 520K, (b) 540K, (c) 580K and (d) 600K, respectively.

### Coordination geometry of Cu-BPy-Cu chain

The coordination geometry of Cu<sub>2</sub> in compound **1** is shown in Fig. S3a. It is 6-coordinated by two STP molecules and two Bpy molecules in an inverse way. The changes of Cu<sub>2</sub> after dehydration are shown in fig. S3b. The coordination geometry of copper atoms remains 6-coordinated but the Cu-Bpy-Cu chain has a torsion angle of 19.131(821)<sup>o</sup>.

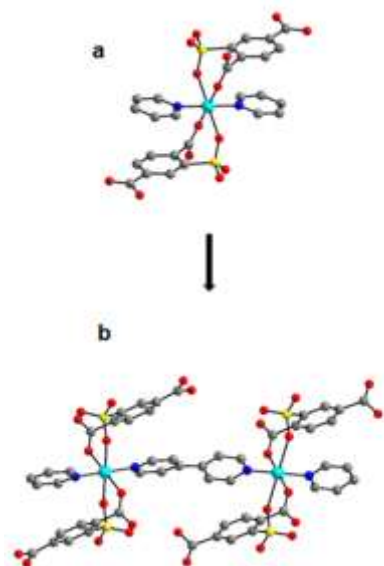

Fig. S3. Coordination environment of Cu<sub>2</sub> atoms in hydrated structure (a) and the changes after dehydration (b). (Cu: turquoise, O: red, S: yellow, C: grey, N: blue. H is not shown for clarity.)

### Crystallographic data

The crystal data and structure refinements of compound **1** and compound **2** are shown in table S1.

**Table S1.** Crystal data and structure refinements of compounds **1** and compound **2**

| Compound                   | <b>1</b>                                                                                      | <b>2</b>                                                                                           |
|----------------------------|-----------------------------------------------------------------------------------------------|----------------------------------------------------------------------------------------------------|
| Formula                    | C <sub>26</sub> H <sub>22</sub> Cu <sub>3</sub> N <sub>2</sub> O <sub>18</sub> S <sub>2</sub> | C <sub>26</sub> H <sub>14.5</sub> Cu <sub>3</sub> N <sub>2</sub> O <sub>14.25</sub> S <sub>2</sub> |
| Formula weight             | 905.20                                                                                        | 837.64                                                                                             |
| Crystal system             | Monoclinic                                                                                    | Monoclinic                                                                                         |
| Space group                | P21/c                                                                                         | P21/c                                                                                              |
| <i>a</i> (Å)               | 11.017(5)                                                                                     | 10.075(5)                                                                                          |
| <i>b</i> (Å)               | 11.814(5)                                                                                     | 12.806(5)                                                                                          |
| <i>c</i> (Å)               | 12.135(5)                                                                                     | 19.502(5)                                                                                          |
| $\alpha$ (°)               | 90.000(5)                                                                                     | 90.000(5)                                                                                          |
| $\beta$ (°)                | 109.701(5)                                                                                    | 95.342(5)                                                                                          |
| $\gamma$ (°)               | 90.000(5)                                                                                     | 90.000(5)                                                                                          |
| <i>V</i> (Å <sup>3</sup> ) | 1487.0(11)                                                                                    | 2505.2(17)                                                                                         |

| Z                                   | 2              | 4              |
|-------------------------------------|----------------|----------------|
| $D_c$ (g/cm <sup>-3</sup> )         | 2.022          | 2.221          |
| $F(000)$                            | 910            | 1670           |
| $\mu$ (mm <sup>-1</sup> )           | 2.890          | 3.411          |
| $\vartheta$ for data collection (°) | 2.85 to 34.65  | 2.96 to 22.79  |
| Reflections collected               | 21375          | 23264          |
| Unique reflections                  | 4736           | 2610           |
| $R_{int}$                           | 0.0578         | 0.0959         |
| Data/restraints/parameters          | 4736/ 6/ 244   | 2610 / 0 / 412 |
| Goodness-of-fit on $F^2$            | 1.023          | 1.045          |
| $R_1, wR_2$ [ $I > 2\sigma(I)$ ]    | 0.0327, 0.0904 | 0.1038, 0.2118 |
| $R_1, wR_2$ (all data)              | 0.0378, 0.0938 | 0.0713, 0.1854 |

$$R_1 = \sum(|F_o| - |F_c|) / \sum|F_o|, wR_2 = [\sum w(F_o^2 - F_c^2)^2 / \sum w(F_o^2)]^{1/2}.$$

Table S2. Selected Bond lengths [Å] for mor20.

|              |            |
|--------------|------------|
| Cu(1)-O(3)   | 1.9321(17) |
| Cu(1)-O(1W)  | 1.9757(16) |
| Cu(1)-O(2W)  | 1.9909(16) |
| Cu(1)-O(5)#1 | 1.9913(16) |
| Cu(1)-O(9)#2 | 2.2895(16) |
| Cu(2)-N(1)#3 | 1.9744(18) |
| Cu(2)-N(1)   | 1.9744(18) |
| Cu(2)-O(6)   | 2.0435(16) |
| Cu(2)-O(6)#3 | 2.0435(16) |
| Cu(2)-O(7)   | 2.2887(17) |
| Cu(2)-O(7)#3 | 2.2887(17) |

Symmetry transformations used to generate equivalent atoms:

#1  $x-1, -y+3/2, z-1/2$  #2  $-x+2, -y+2, -z+1$  #3  $-x+3, -y+2, -z+2$

#4  $x+1, -y+3/2, z+1/2$  #5  $-x+2, -y+2, -z+2$

Table S3. Selected Bond lengths [ $\text{\AA}$ ] for mor21.

---

|               |           |
|---------------|-----------|
| Cu(1)-O(13)   | 1.825(8)  |
| Cu(1)-O(11)#1 | 1.907(10) |
| Cu(1)-O(12)#1 | 1.948(9)  |
| Cu(1)-O(1)    | 1.960(9)  |
| Cu(1)-C(15)#1 | 2.253(15) |
| Cu(1)-S(1)    | 2.769(4)  |
| Cu(2)-O(5)#2  | 1.856(9)  |
| Cu(2)-O(7)#3  | 1.869(12) |
| Cu(2)-O(10)   | 1.975(10) |
| Cu(2)-O(6)#3  | 2.121(14) |
| Cu(2)-O(9)#4  | 2.193(10) |
| Cu(2)-C(8)#3  | 2.29(2)   |
| Cu(3)-N(2)#5  | 1.889(12) |
| Cu(3)-N(2)    | 1.889(12) |
| Cu(3)-O(14)   | 2.027(9)  |
| Cu(3)-O(14)#5 | 2.027(9)  |
| Cu(3)-O(8)    | 2.334(10) |
| Cu(3)-O(8)#5  | 2.335(10) |
| Cu(4)-N(1)#2  | 1.895(13) |
| Cu(4)-N(1)    | 1.895(13) |
| Cu(4)-O(4)    | 1.923(9)  |
| Cu(4)-O(4)#2  | 1.923(9)  |

---

Symmetry transformations used to generate equivalent atoms:

#1  $x, -y+1/2, z+1/2$  #2  $-x, -y+1, -z+1$  #3  $-x, y-1/2, -z+3/2$

#4  $-x, -y, -z+1$  #5  $-x-1, -y, -z+1$  #6  $-x, y+1/2, -z+3/2$

#7  $x, -y+1/2, z-1/2$  #8  $-x-1, y+1/2, -z+1/2$  #9  $-x-1, y-1/2, -z+1/2$
